# Supplementary material
Source: PubMed Central journal article supplement (PMC2676109)

## Supporting Information

### **The Functional Role of Asp160 and the Deprotonation Mechanism of Ammonium in the *Escherichia coli* Ammonia Channel Protein AmtB**

Yuchun Lin<sup>1,§</sup>, Zexing Cao<sup>2,\*</sup> and Yirong Mo<sup>1,2,\*</sup>

<sup>1</sup> *Department of Chemistry, Western Michigan University, Kalamazoo, MI 49008, USA*

<sup>2</sup> *Department of Chemistry, the State Key Laboratory for Physical Chemistry of Solid States, Center for Theoretical Chemistry, Xiamen University, Xiamen, Fujian 361005, P. R. China*

§Present address: Department of Mathematics and Statistics and Department of Physics and Optical Science, University of North Carolina at Charlotte, Charlotte, NC 28223

\*Corresponding authors: Yirong Mo, Email: [yirong.mo@wmich.edu](mailto:yirong.mo@wmich.edu); Zexing Cao, E-mail: [zxcao@xmu.edu.cn](mailto:zxcao@xmu.edu.cn).

**Complete citation for Reference 30:**

MacKerell, A. D.; Bashford, D.; Bellott, M.; Dunbrack, R. L.; Evanseck, J. D.; Field, M. J.; Fischer, S.; Gao, J.; Guo, H.; Ha, S.; Joseph-McCarthy, D.; Kuchnir, L.; Kuczera, K.; Lau, F. T. K.; Mattos, C.; Michnick, S.; Ngo, T.; Nguyen, D. T.; Prodhom, B.; Reiher, W. E.; Roux, B.; Schlenkrich, M.; Smith, J. C.; Stote, R.; Straub, J.; Watanabe, M.; Wiorkiewicz-Kuczera, J.; Yin, D.; Karplus, M. *J. Phys. Chem. B* **1998**, *102*, 3586.

**Figure S1.** A snapshot showing the hydrogen bonding interactions of the hydroxide anion with surrounding residues and solvent molecules at the transition state in the deprotonation of ammonium cation.

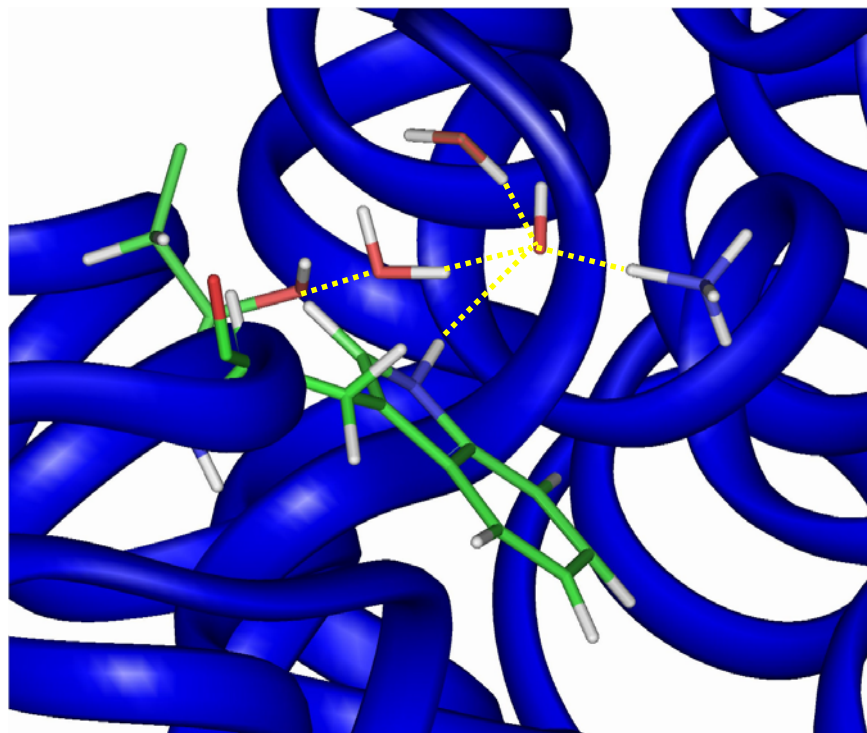

Supplement: NIHMS103282-supplement-1_si_001.pdf [file NIHMS103282-supplement-1_si_001.pdf]
